# Supplementary material for: Micro- and mesoscopic structural features of a bio-based choline-amino acid ionic liquid
Source: Royal Society of Chemistry journal article supplement (doi:10.1039/c6ra02142e), 2016-01-01
Supplement: c6ra02142e1.pdf [file c6ra02142e1.pdf]

## **“Micro- and mesoscopic structural features of a bio-based choline-amino acid ionic liquid.”** By Olga Russina\* , Serena De Santis, Lorenzo Gontrani

Supplementary information

Partial charges for the two residues NLE and COL.

### Coline

O1 -0.602013  
H1 0.445412  
C1 0.261529  
H2 0.013838  
H3 0.013838  
C2 -0.056046  
H4 0.100214  
H5 0.100214  
N1 0.190230  
C4 -0.306978  
H9 0.161524  
H10 0.161524  
H11 0.161524  
C5 -0.306978  
H12 0.161524  
H13 0.161524  
H14 0.161524  
C3 -0.306978  
H6 0.161524  
H7 0.161524  
H8 0.161524

### NLE

O1 -0.688904  
C1 0.569776  
O2 -0.688904  
C2 0.453658  
N1 -1.013086  
H1 0.316121  
H2 0.316121  
H3 -0.051937  
C3 -0.074454  
H4 -0.033798  
H5 -0.033798  
C4 -0.056613  
H6 0.015047  
H7 0.015047  
C5 0.124058  
H8 -0.026260  
H9 -0.026260  
C6 -0.213882  
H10 0.032689  
H11 0.032689  
H12 0.032689

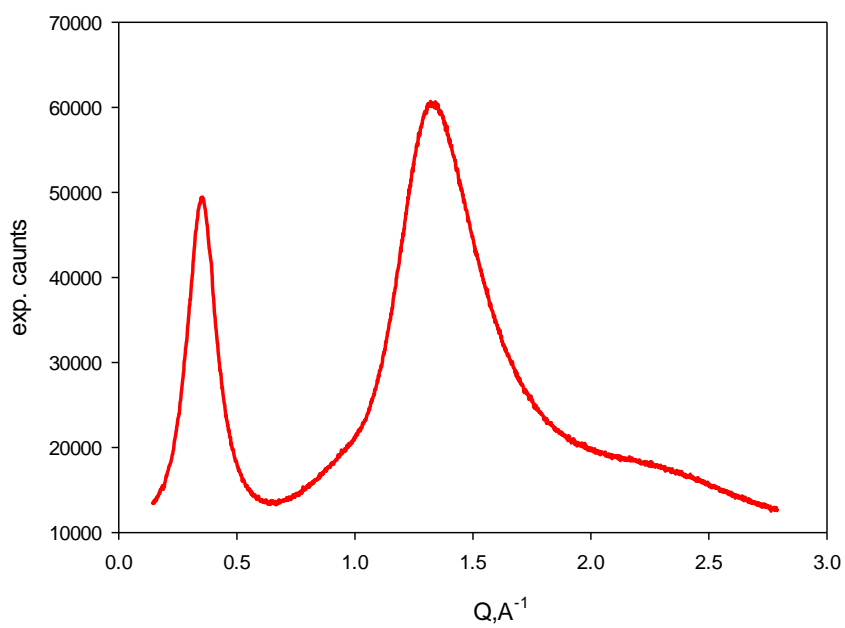

Fig 1. Diffraction data of [cho][nle] collected on x-ray diffractometer ( $\lambda=0.1541 \text{ \AA}$ ) show evidently the presence of low Q-peak at around  $0.35 \text{ \AA}^{-1}$ .
